# Supplementary figures and images for: Elucidating the Associated Biological Function and Clinical Significance of RHOJ Expression in Urothelial Carcinoma
Source: MDPI journal article supplement (doi:10.3390/ijms241814081), 2023-09-14

GSE32894  
Imsig signature

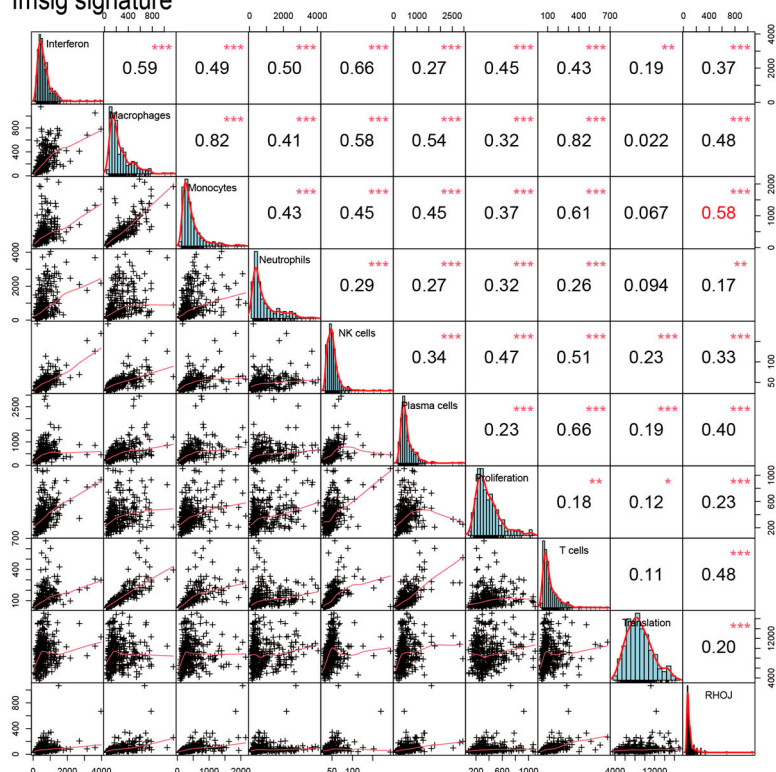

TIDE signature

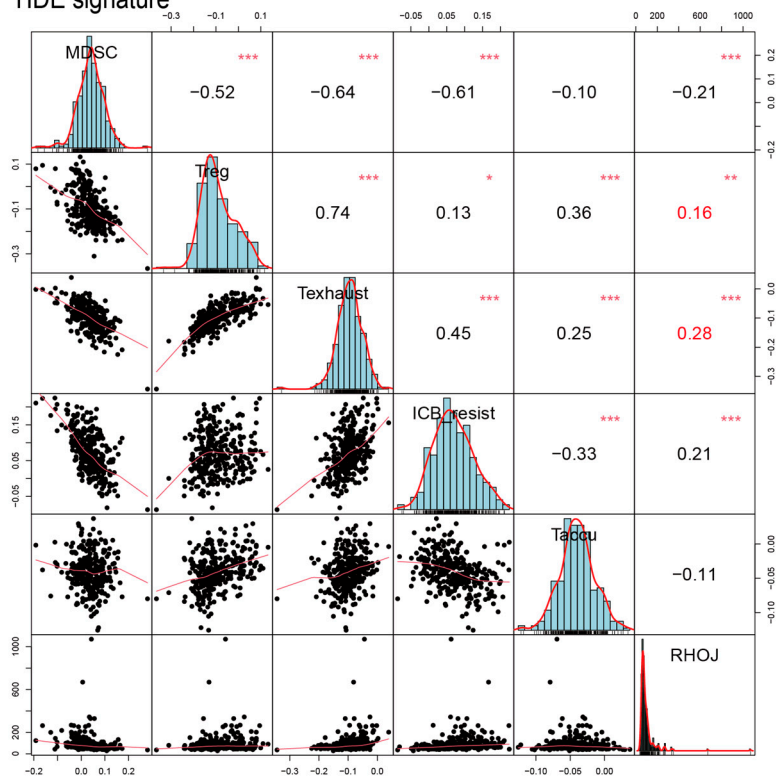

Figure S1: RHOJ correlation to ImSig and TIDE in GSE32894. \*  $p < 0.05$ , \*\*  $p < 0.01$ , \*\*\*  $p < 0.001$ .

Supplement: s1 [file s1]
